# Supplementary material for: Isolation of endothelial cells, pericytes and astrocytes from mouse brain
Source: PubMed Central journal article supplement (PMC6919623; doi:10.1371/journal.pone.0226302), 2019-12-18
Supplement: pone.0226302.s002.pdf [file pone.0226302.s002.pdf]

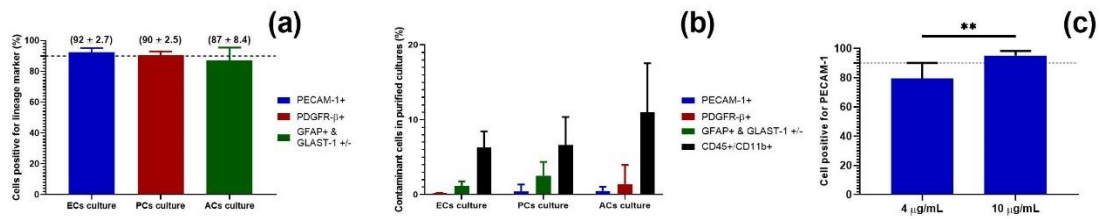

**S2 Fig. Results of population purity by flow cytometry analysis for a given isolation.** (a) Percentage of the total number of cells in culture positive for (i) blue: platelet endothelial cell adhesion molecule 1 (PECAM-1 – ECs culture at P1), (ii) red: platelet-derived growth factor receptor (PDGFR-β – PCs culture at P3) and (iii) green: glial fibrillary acidic protein (GFAP) or double positive with glutamate aspartate transporter (GLAST-1) (ACs culture at P1), respectively. (b) Percentage of the total number of cells in culture positive for other lineage markers (i.e.: contaminant cells) in each isolation. (c) Percentage of PECAM-1 positive ECs cultured with either  $4 \mu\text{g} \times \text{mL}^{-1}$  of puromycin or  $10 \mu\text{g} \times \text{mL}^{-1}$  in the medium for the first two days. The results are represented as the mean values  $\pm$  standard deviations ( $n \geq 5$ ). T-test : \*\*  $0.001 \leq P\text{-value} \leq 0.01$ .
