# Supplementary material for: Isolation of endothelial cells, pericytes and astrocytes from mouse brain
Source: PubMed Central journal article supplement (PMC6919623; doi:10.1371/journal.pone.0226302), 2019-12-18
Supplement: pone.0226302.s003.pdf [file pone.0226302.s003.pdf]

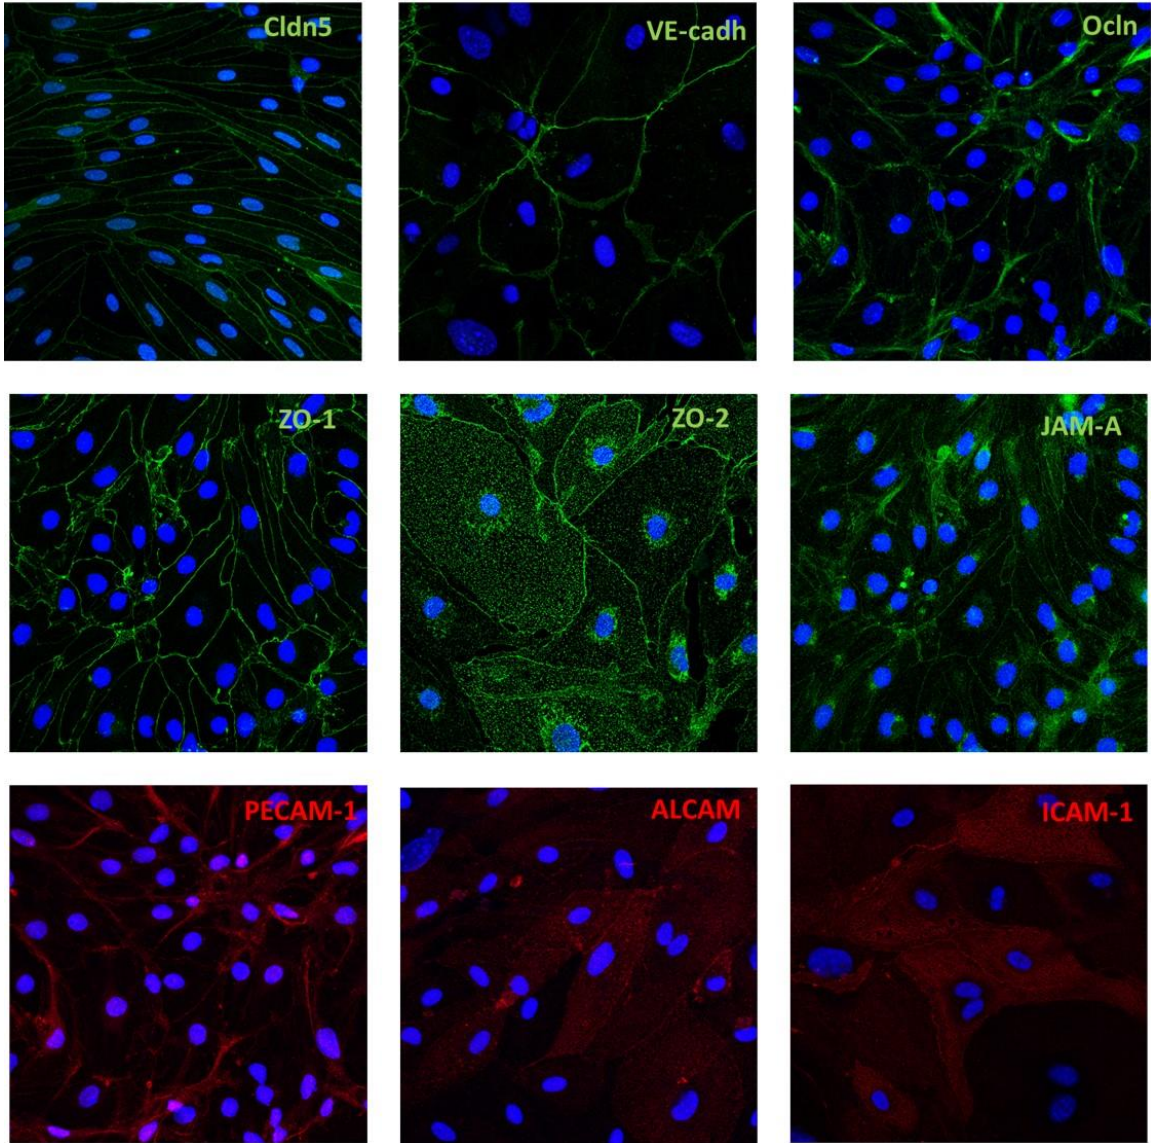

**S3 Fig. Confocal microscopy of primary endothelial cells marked for several proteins.** Primary endothelial cells were immunolabelled with antibodies against the following junction proteins: Claudin-5 (Cldn5), vascular-endothelial cadherin (VE-cadh), occludin (Ocln), zonula occludens-1 (ZO-1), zonula occludens-2 (ZO-2) and junctional adhesion molecule-A (JAM-A), as represented in green. Immunolabelled cell adhesion proteins, namely platelet endothelial cell adhesion molecule 1 (PECAM-1), activated leukocyte cell adhesion molecule (ALCAM) and intercellular adhesion molecule-1 (ICAM1), are shown in red. Representative of n = 4.
