# Supplementary material for: Isolation of endothelial cells, pericytes and astrocytes from mouse brain
Source: PubMed Central journal article supplement (PMC6919623; doi:10.1371/journal.pone.0226302), 2019-12-18
Supplement: pone.0226302.s004.pdf [file pone.0226302.s004.pdf]

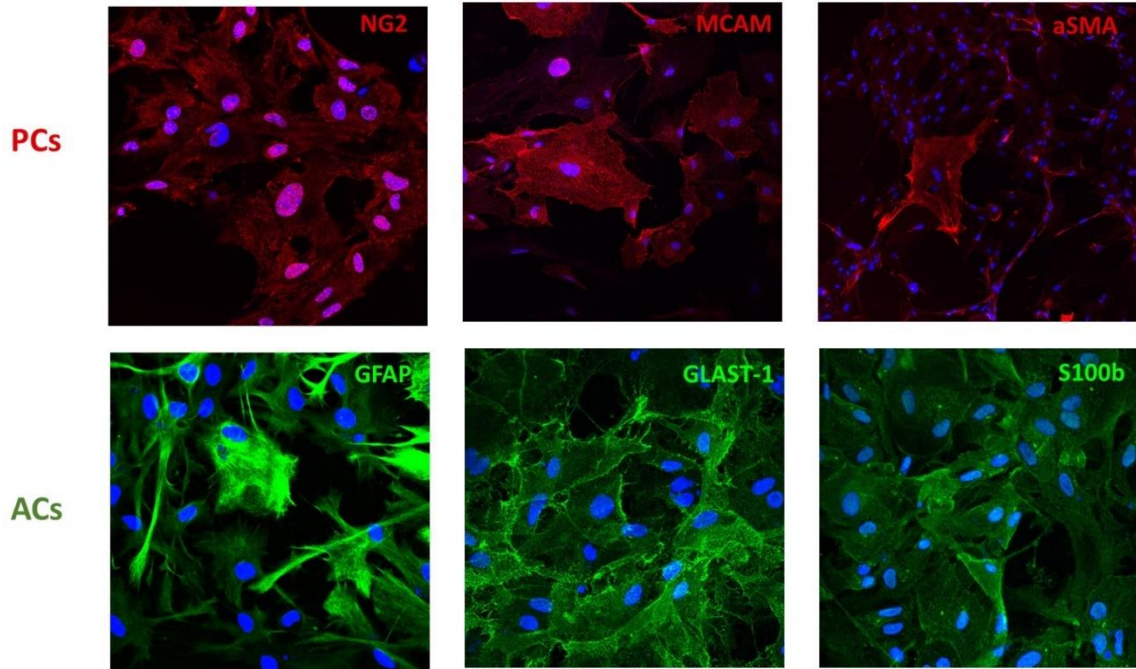

**S4 Fig. Confocal microscopy of primary pericytes (PCs) and astrocytes (ACs) marked for several proteins.** PCs (top panel) were immunolabelled with antibodies against neural/glial 2 (NG2), melanoma cell adhesion molecule (MCAM) and alpha smooth muscle actin (aSMA), as shown in red. ACs (bottom panel) were immunolabelled with antibodies against glial fibrillary acidic protein (GFAP), glutamate aspartate transporter-1 (GLAST-1) and S100 calcium-binding protein B (S100b), as shown in green. Representative of n = 4.
