# Supplementary material for: Isolation of endothelial cells, pericytes and astrocytes from mouse brain
Source: PubMed Central journal article supplement (PMC6919623; doi:10.1371/journal.pone.0226302), 2019-12-18
Supplement: pone.0226302.s005.pdf [file pone.0226302.s005.pdf]

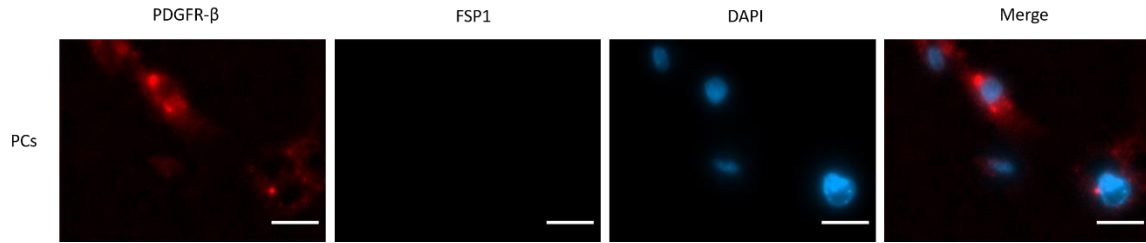

**S5 Fig. Primary pericytes (PCs) do not express fibroblast-specific protein 1 (FSP1).** Fluorescence microscopy images of PCs immunolabelled with antibodies against platelet-derived growth factor receptor (PDGFR- $\beta$ , red) and fibroblast-specific protein 1 (FSP1, green). Representative of n = 4.
