# Supplementary material for: Isolation of endothelial cells, pericytes and astrocytes from mouse brain
Source: PubMed Central journal article supplement (PMC6919623; doi:10.1371/journal.pone.0226302), 2019-12-18
Supplement: pone.0226302.s006.pdf [file pone.0226302.s006.pdf]

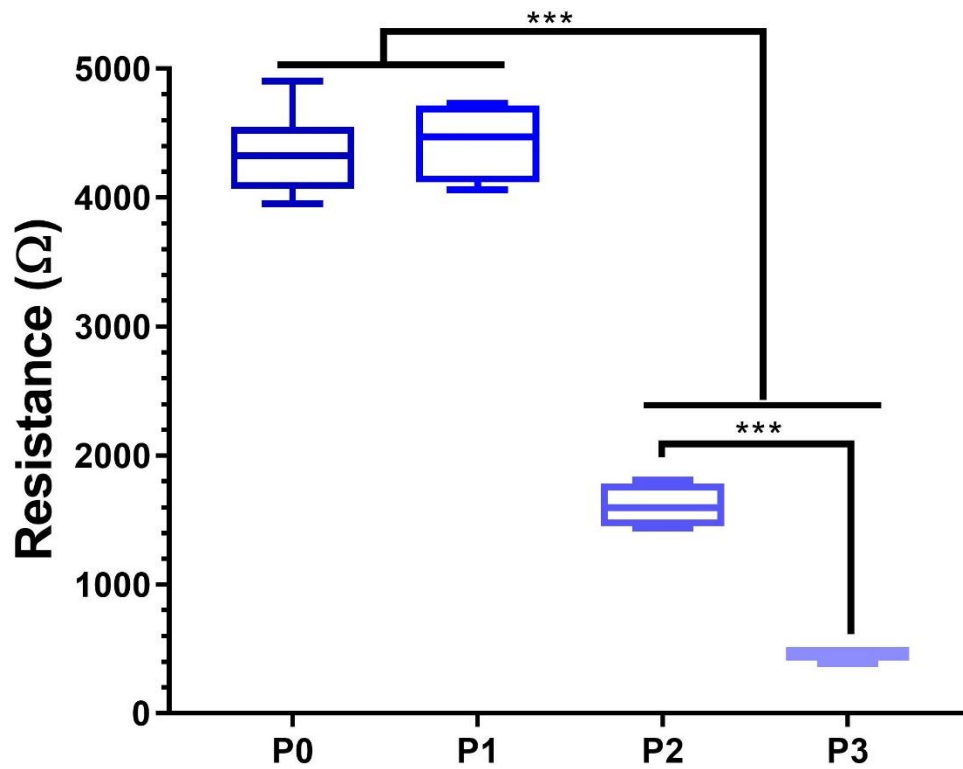

**S6 Fig. Maximum impedance of endothelial cell (EC) monolayers at different passages.** The measurements were done 144h after seeding primary ECs at P0 and 72h for ECs at P1-P3. The results are expressed as whiskers plots of 4 separate experiments with max, median and min values ( $n \geq 4$ ). Nonparametric Man-Whitney test: \* P-value < 0.05 \*\*\* P-value  $\leq 0.001$
