# Supplementary material for: Isolation of endothelial cells, pericytes and astrocytes from mouse brain
Source: PubMed Central journal article supplement (PMC6919623; doi:10.1371/journal.pone.0226302), 2019-12-18
Supplement: pone.0226302.s007.pdf [file pone.0226302.s007.pdf]

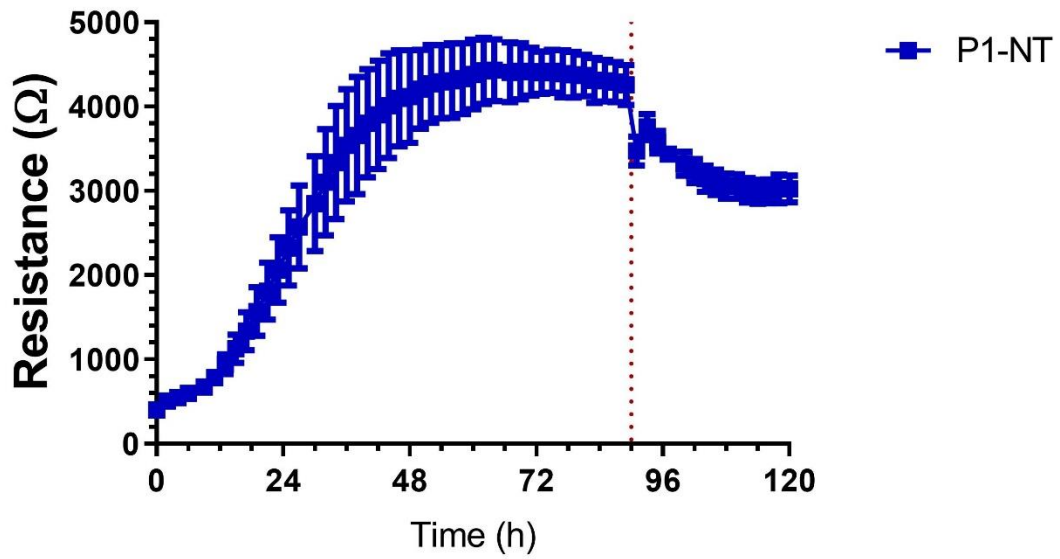

**S7 Fig. Electrical resistance of primary cultures of endothelial cells without treatment, as measured by ECIS Z0.** Transcellular electrical resistance of endothelial cells (ECs) at passage 1 (n=6). The culture media was changed after 90 hours and it is represented by the dotted line. Each point represents the mean resistance measured every 2 hours  $\pm$  standard deviations.
