# Supplementary material for: Isolation of endothelial cells, pericytes and astrocytes from mouse brain
Source: PubMed Central journal article supplement (PMC6919623; doi:10.1371/journal.pone.0226302), 2019-12-18
Supplement: pone.0226302.s008.pdf [file pone.0226302.s008.pdf]

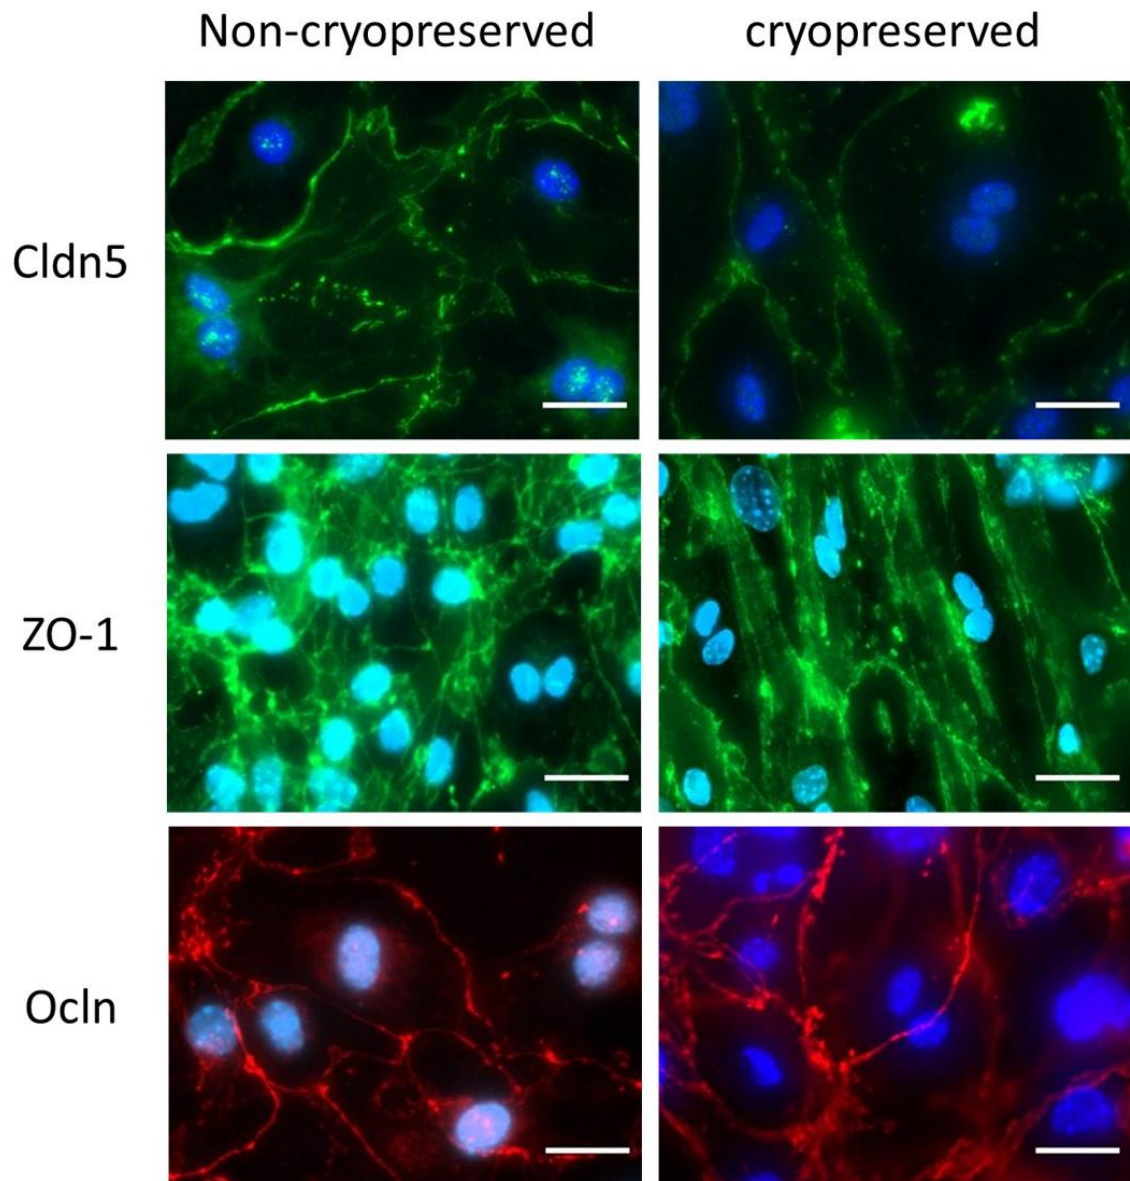

**S8 Fig. Fluorescence microscopy images comparing cryopreserved (right panel) and non-cryopreserved (left panel) primary endothelial cells for junctional protein expression.** Previously cryopreserved ECs (in 90% FBS and 10% DMSO at a concentration of 1 million cells/mL) currently at passage 1 (P1) (right panel) and non-cryopreserved P1 ECs (left panel) are shown. The cells in both conditions were allowed to reach confluence before imaging. Claudin-5 (Cldn5) (top), zonula occludens-1 (ZO-1) (center) and occludin (Ocln) (bottom) were immunolabelled and imaged using a fluorescence microscope. Nuclei were stained with DAPI. Scale bar is 25  $\mu$ m. Representative of n = 3.
