# Supplementary material for: Isolation of endothelial cells, pericytes and astrocytes from mouse brain
Source: PubMed Central journal article supplement (PMC6919623; doi:10.1371/journal.pone.0226302), 2019-12-18
Supplement: pone.0226302.s010.pdf [file pone.0226302.s010.pdf]

**S2 Table. Detailed list of used reagents**

| <b>Reagents</b>                                                       |                     |                                                            |                    |
|-----------------------------------------------------------------------|---------------------|------------------------------------------------------------|--------------------|
| <b>Item</b>                                                           | <b>Acronym</b>      | <b>Provider</b>                                            | <b>Catalogue #</b> |
| Bovine Serum Albumin Fraction V                                       | BSA                 | Wisent, Saint-Jean-Baptiste, QC, Canada                    | 800-095-Eg         |
| Collagen from human placenta, type IV                                 | Collagen type IV    | Sigma-Aldrich, Oakville, ON, Canada                        | C5533              |
| Collagenase, Type 2                                                   | Type 2 collagenase  | Worthington Biochemical Corp., Lakewood, NJ, United States | LS004174           |
| Collagenase/dispase                                                   | Collagenase/dispase | Sigma-Aldrich, Oakville, ON, Canada                        | 10269638001        |
| Deoxyribonuclease I                                                   | DNase I             | Worthington Biochemical Corp., Lakewood, NJ, United States | LS002138           |
| Dulbecco's Modified Eagle Medium high glucose                         | DMEM high           | Wisent, Saint-Jean-Baptiste, QC, Canada                    | 319-005-CL         |
| Dulbecco's Modified Eagle Medium low glucose                          | DMEM low            | Wisent, Saint-Jean-Baptiste, QC, Canada                    | 219-020-XK         |
| Dulbecco's Phosphate Buffered Solution, without calcium and magnesium | PBS                 | Wisent, Saint-Jean-Baptiste, QC, Canada                    | 311-425-CL         |
| Extreme DMEM                                                          | X-DMEM              | Wisent, Saint-Jean-Baptiste, QC, Canada                    | 319-100-CL         |
| Fibroblast growth factor-Basic                                        | bFGF                | Thermo Fisher Scientific, Burlington, ON, Canada           | PHG0024            |
| Fluorescein Sodium                                                    | Na-Fluo             | Sigma-Aldrich, Oakville, ON, Canada                        | FX0325             |
| Fluorescein isothiocyanate carboxymethyl dextran                      | Dextran-Fluo        | Sigma-Aldrich, Oakville, ON, Canada                        | 74817              |
| Foetal Bovine Serum                                                   | FBS                 | Wisent, Saint-Jean-Baptiste, QC, Canada                    | 080-150            |
| Hank's Balanced Salt Solution (10X)                                   | HBSS 10X            | Thermo Fisher Scientific, Burlington, ON, Canada           | 14065-056          |
| Hank's Balanced Salt Solution (1X)                                    | HBSS                | Thermo Fisher Scientific, Burlington, ON, Canada           | 14025-092          |
| heparin sodium                                                        | heparin             | Fisher Scientific, Ottawa, ON, Canada                      | BP2425             |
| HEPES (1M)                                                            | HEPES               | Thermo Fisher Scientific, Burlington, ON, Canada           | 15630-080          |
| Hydrocortisone                                                        | Hydrocortisone      | Sigma-Aldrich, Oakville, ON, Canada                        | H0888              |
| Insulin-Transferin-Sodium Selenite media supplement                   | ITS                 | Sigma-Aldrich, Oakville, ON, Canada                        | I1884-1VL          |
| Invitrogen, SlowFade Diamond antifade mountant with DAPI              | mounting media      | Thermo Fisher Scientific, Burlington, ON, Canada           | S36968             |

|                                                        |                 |                                                     |            |
|--------------------------------------------------------|-----------------|-----------------------------------------------------|------------|
| Iodonitrotetrazolium chloride                          | INT             | Sigma-Aldrich, Oakville, ON, Canada                 | I8377      |
| Lithium-Lactate                                        | Lithium-Lactate | Sigma-Aldrich, Oakville, ON, Canada                 | 440469     |
| Penicillin Streptomycin                                | Pen/Strep       | Wisent, Saint-Jean-Baptiste, QC, Canada             | 450-201-EL |
| Percoll                                                | Percoll         | GE HealthCare Bio-Sciences, Baie-d'Urfé, QC, Canada | 17-0891-01 |
| Phenazine methosulfate                                 | PMS             | Sigma-Aldrich, Oakville, ON, Canada                 | P9625      |
| Poly-L-ornithine                                       | PLO             | Sigma-Aldrich, Oakville, ON, Canada                 | P3655      |
| Puromycin dihydrochloride from Streptomyces alboniger  | puromycin       | Sigma-Aldrich, Oakville, ON, Canada                 | P8833      |
| Smooth Muscle Growth Supplement                        | SMGS            | Thermo Fisher Scientific, Burlington, ON, Canada    | S00725     |
| Thiazolyl Blue Tetrazolium Bromide                     | MTT             | Sigma-Aldrich, Oakville, ON, Canada                 | M5655      |
| Tris(hydroxymethyl)aminomethane                        | Tris            | Sigma-Aldrich, Oakville, ON, Canada                 | 252859     |
| Trypsin-EDTA (0.25 %), phenol red                      | Trypsin         | Thermo Fisher Scientific, Burlington, ON, Canada    | 25200072   |
| $\beta$ -Nicotinamide adenine dinucleotide sodium salt | NAD             | Sigma-Aldrich, Oakville, ON, Canada                 | N0632      |
