# Supplementary material for: Isolation of endothelial cells, pericytes and astrocytes from mouse brain
Source: PubMed Central journal article supplement (PMC6919623; doi:10.1371/journal.pone.0226302), 2019-12-18
Supplement: pone.0226302.s011.pdf [file pone.0226302.s011.pdf]

**S3 Table. Detailed list of used consumables**

| <b>Consumables</b>                                                                                                                                   |                      |                                                 |                    |
|------------------------------------------------------------------------------------------------------------------------------------------------------|----------------------|-------------------------------------------------|--------------------|
| <b>Item</b>                                                                                                                                          | <b>Acronym</b>       | <b>Provider</b>                                 | <b>Catalogue #</b> |
| BD PrecisionGlide Needle gauge 18 × 1 ½                                                                                                              | 18G                  | BD Biosciences, Mississauga, ON, Canada         | 305196             |
| BD PrecisionGlide Needle gauge 20 × 1 ⅓                                                                                                              | 20G                  | BD Biosciences, Mississauga, ON, Canada         | 305176             |
| BD PrecisionGlide Needle gauge 22 × 1 ¼                                                                                                              | 22G                  | BD Biosciences, Mississauga, ON, Canada         | 305156             |
| Cryopure Tubes, 1 mL                                                                                                                                 | Cryotubes            | SARSTEDT, Sarstedtstraße, Nümbrecht, Germany    | 72.377.992         |
| ECIS Cultureware™ Disposable Electrode Arrays                                                                                                        | 8W10E+               | Applied Biophysics Inc, Troy, NY, United States | 8W10E+             |
| Falcon flask 25 cm <sup>2</sup>                                                                                                                      | T25                  | Corning, Ottawa, ON, Canada                     | 353109             |
| Falcon flask 75 cm <sup>2</sup>                                                                                                                      | T75                  | Corning, Ottawa, ON, Canada                     | 353136             |
| FALCON Multiwell 6-Well                                                                                                                              | 6-Well plates        | Corning, Ottawa, ON, Canada                     | 353046             |
| Ibidi µ-Slide VI <sup>0.4</sup> Collagen IV                                                                                                          | Ibidi Collagen IV    | Ibidi, Fitchburg, WI, United States             | 80602              |
| Ibidi µ-Slide VI <sup>0.4</sup> IbiTreat                                                                                                             | IbiTeat              | Ibidi, Fitchburg, WI, United States             | 80606              |
| Qualitative Grade Plain Filter Paper Sheets                                                                                                          | filter paper         | Fisher Scientific, Ottawa, ON, Canada           | 09-802-1B          |
| Sterile syringe 10 mL                                                                                                                                | syringe              | BD Biosciences, Mississauga, ON, Canada         | 309605             |
| STERITOP-GP 45 mm 500 mL                                                                                                                             | Filter top           | Fisher Scientific, Ottawa, ON, Canada           | SCGPT05RE          |
| Thermo Scientific™ Nalgene™ Oak Ridge High-Speed Polycarbonate Centrifuge Tubes                                                                      | Ultracentrifuge tube | Fisher Scientific, Ottawa, ON, Canada           | 05-529C            |
| Transwell® Permeable supports<br>6.5 mm Insert, 24 well plate<br>0.4 µm Polyester membrane<br>Thickness 10 µm<br>Tissue Culture Treated, Polystyrene | 24 well plate        | Corning incorporated, Kennebunk, ME, USA        | Costar 3470        |
