# Supplementary material for: Isolation of endothelial cells, pericytes and astrocytes from mouse brain
Source: PubMed Central journal article supplement (PMC6919623; doi:10.1371/journal.pone.0226302), 2019-12-18
Supplement: pone.0226302.s012.pdf [file pone.0226302.s012.pdf]

**S4 Table. Detailed list of used equipment**

| <b>Equipment</b>                         |                         |                                                             |                           |
|------------------------------------------|-------------------------|-------------------------------------------------------------|---------------------------|
| <b>Item</b>                              | <b>Acronym</b>          | <b>Provider</b>                                             | <b>Catalogue #</b>        |
| Leica-TCS-SP5                            | Confocal microscope     | Leica Microsystems Inc.,<br>Concord, ON, Canada             | N.A.                      |
| Biometra TProfessional Basic 96 gradient | ThermoCycler            | Analytik Jena                                               | N.A.                      |
| BD FACSDiva                              | flow cytometry software | BD Biosciences,<br>Mississauga, ON, Canada                  | v8.0.1                    |
| BD LSR II Flow Cytometry Cell Analyzer   | Flow cytometry          | BD Biosciences,<br>Mississauga, ON, Canada                  | N.A.                      |
| Bead bath Lab armor                      | warming bath            | Sheldon Manufacturing,<br>Cornelius, OR, United States      | 74300-714                 |
| Corning LSE benchtop shaking incubator   | shaking incubator       | Corning, Ottawa, ON,<br>Canada                              | 6790                      |
| ECIS Z0 and 16W array station            | ECIS                    | Applied Biophysics Inc,<br>Troy, NY, United States          | Software<br>v1.2.215.0 PC |
| Endohm-6 cup                             | Cup                     | World Precision Instruments, Sarasota,<br>FL, United States |                           |
| Fluorescence elumination system X-cite   | fluorescence source     | Excelitas, Vaudreuil-Dorion, QC, Canada                     | 120PC Q                   |
| Forma™ Steri-Cycle™ CO2 Incubators       | incubator               | Thermo Fisher Scientific,<br>Burlington, ON, Canada         | 370                       |
| IX81 Inverted Microscope                 | Fluorescence microscope | Olympus, Waltham, MA,<br>United States                      | IX81                      |
| Leica MZ16 stereo microscope             | dissecting microscope   | Leica Microsystems Inc.,<br>Concord, ON, Canada             | N.A.                      |
| MetaMorph Advanced                       | acquisition software    | Molecular Devices,<br>Sunnyvale, CA, United States          | v7.8.9.0                  |
| Motic Image plus 3.0                     | acquisition software    | Moticam, Kowloon Bay,<br>Kowloo, Hong Kong                  | N.A.                      |
| MOTICAM 3+ 3.0 MP                        | camera                  | Moticam, Kowloon Bay,<br>Kowloo, Hong Kong                  |                           |
| Mr. Frosty Freezing container            | freezing container      | Thermo Fisher Scientific,<br>Burlington, ON, Canada         | 15-350-50                 |
| MILLICELL-ERS                            | TEER                    | MILLIPOR, Burlington,<br>MA, United States                  | N.A.                      |
| Retiga 2000R CCD Camera                  | camera                  | QIMAGING, Surrey, BC,<br>Canada                             | RET-2000R-F-M-12-C        |
| Sorvall RC 6 Superspeed centrifuge       | ultracentrifuge         | Thermo Fisher Scientific,<br>Burlington, ON, Canada         | 501057486-6               |

|                                             |                            |                                                             |                  |
|---------------------------------------------|----------------------------|-------------------------------------------------------------|------------------|
| Sorvall ST 16R centrifuge                   | centrifuge                 | Thermo Fisher Scientific,<br>Burlington, ON, Canada         | 75004240         |
| Worthington Liquid Nitrogen<br>Refrigerator | azote Tank                 | Worthington industries,<br>Columbus, OH, United<br>States   | XT34             |
| ZEISS Axiovert S100                         | bright field<br>microscope | Carl Zeiss Microscopy<br>LLC, Peabody, MA,<br>United States | Axiovert<br>S100 |
