# Supplementary material for: Isolation of endothelial cells, pericytes and astrocytes from mouse brain
Source: PubMed Central journal article supplement (PMC6919623; doi:10.1371/journal.pone.0226302), 2019-12-18
Supplement: pone.0226302.s013.pdf [file pone.0226302.s013.pdf]

**S5 Table. FACS antibodies and isotypes.**

| <b>Target</b>  | <b>Host/Isotype</b> | <b>Fluorochrome</b> | <b>Provider</b>         | <b>Catalogue</b> | <b>Quantity (µg/test)</b> |
|----------------|---------------------|---------------------|-------------------------|------------------|---------------------------|
| <b>PDGFR-β</b> | Rat/IgG2a, kappa    | PE                  | eBioscience             | 12-1402-81       | 0.6                       |
| <b>PECAM-1</b> | Rat/IgG2a, kappa    | PE-Cy7              | Biolegend               | 102418           | 0.25                      |
| <b>GLAST-1</b> | Mice/IgG2a          | APC                 | Milteny Biotec          | 130-098-803      | 0.5                       |
| <b>GFAP</b>    | Mice/IgG1, kappa    | A488                | ThermoFisher scientific | A-21294          | 0.5                       |
| <b>CD45</b>    | Rat/IgG2b, kappa    | PerCP-Cy5.5         | BDbioscience            | 550994           | 0.25                      |
| <b>CD11b</b>   | Rat/IgG2b, kappa    | A700                | BDbioscience            | 557960           | 0.4                       |
