# Supplementary material for: Isolation of endothelial cells, pericytes and astrocytes from mouse brain
Source: PubMed Central journal article supplement (PMC6919623; doi:10.1371/journal.pone.0226302), 2019-12-18
Supplement: pone.0226302.s015.pdf [file pone.0226302.s015.pdf]

**S7 Table. q-PCR probes and primers**

| Target                  | Genes      | Efficiency | UPL <sup>a</sup> | Sequence reference                 | Primer A                  | Primer B                      |
|-------------------------|------------|------------|------------------|------------------------------------|---------------------------|-------------------------------|
| <i>Cldn-5</i>           | Cldn5      | 98.6       | 52               | NM_013805.4                        | TTAAGGCACGGGTAGCACTC      | ATGTTGGCGAACCCAGCAG           |
| <i>Ocln</i>             | Ocln       | 94.1       | 10               | NM_008756.2                        | GTCCGTGAGGCCTTTTGA        | GGTGCATAATGATTGGGT<br>TTG     |
| <i>ZO-1<sup>b</sup></i> | ZO-1       | 94.0       | 81               | NM_009386.2,<br>NM_001163574<br>.1 | CGCGGAGAGAGACAAGATGT      | GAAGCGTCACTGTGTGCT<br>GT      |
| <i>P-gp</i>             | Abcb1<br>a | 97.0       | 18               | NM_011076.2                        | GGGCATTTACTTCAA<br>CTTGTC | TTTACAAGCTTCATTT<br>CTAATTCAA |
| <i>BCRP</i>             | Abcg2      | 97.0       | 25               | NM_011920.3                        | AGGTCTGGAAAAAGTAGCAGATTC  | CTCCATCCCTATGCTTG<br>TCC      |
| <i>GLUT-1</i>           | Slc2a1     | 101        | 4                | NM_011400.3                        | GTATCCTGTTGCCCTTC<br>TGC  | TCGAAGCTTCTTCAGCAC<br>AC      |
| <i>Hprt</i>             | Hprt       | 91.2       | 95               | NM_013556.2                        | TCCTCCTCAGACCGCTT<br>TT   | CCTGGTTCATCATCGCTA<br>ATC     |
| <i>Gapdh</i>            | Gapdh      | 91.2       | 80               | NM_008084.2                        | TGTCCGTCGTGGATCTG<br>AC   | CCTGCTTACCACCTTCT<br>TG       |
| <i>Tbp</i>              | Tbp        | 105        | 97               | NM_013684.3                        | GGGAGAATCATGGACCA<br>GAA  | GATGGGAATTCCAGGAGT<br>CA      |

<sup>a</sup>: Universal Probe Library from Roche Life Science.

<sup>b</sup>: Two primer pairs were used to detect the two isoforms of zonula occludens 1 (ZO-1).
